# Supplementary material for: Convict cichlid parents that stay with the same mate develop unique and consistent divisions of roles
Source: PeerJ. 2020 Dec 14;8:e10534. doi: 10.7717/peerj.10534 (PMC7745672; doi:10.7717/peerj.10534)
Supplement: Supplemental Information 1 [file peerj-08-10534-s001.xlsx]

## Sheet: Raw Data
	Male Retrievals			Female Retrievals			Male Time in Nest			Female Time in Nest			Male Time Intruder			Female Time Intruder			Male RATE Aggressive Behaviors			Female RATE Aggressive Behaviors					PAIR ANALYSIS	Experimental	% Time Divided			% Time Together Intruder			AS A PAIR	Retrievals			% time that at least ONE parent is in the nest			% time that at least ONE parent is near the intruder			Rate of aggression
Experimental Group	Bout 1	Bout 2		Bout 1	Bout 2		Bout 1	Bout 2		Bout 1	Bout 2		Bout 1	Bout 2		Bout 1	Bout 2		Bout 1	Bout 2		Bout 1	Bout 2					Group	Bout 1	Bout 2		Bout 1	Bout 2		Experimental Group	Bout 1	Bout 2		Bout 1	Bout 2		Bout 1	Bout 2		Bout 1	Bout 2
Same	0	7		69	46		0	0		33.5	26.7		64.2	41.6		17.8	0		27.1	36.8		31.4	0					same	16.6	16.6		13.9	0		same	69	53		33.54	26.67		68.16	41.89		58.5	36.8
Same	10	10		47	51		1.7	6.1		21.1	13.6		58.5	57.5		40.2	43.6		28.4	26.6		32	27.7					same	6.6	11.5		38	38.9		same	57	61		21.51	19.54		60.8	62.21		60.4	54.3
Same	51	6		0	43		0	0		0	18.9		3.6	3.8		0	4.4		23.5	30		0	26.3					same	3.6	0		0	0		same	51	49		0	18.88		3.7	8.69		23.5	56.3
Same	1	0		42	23		21.3	6.1		34.7	14		31.8	76.9		5.7	50.6		30.2	24.5		31	25.6					same	8.4	5.35		0	50.6		same	43	23		51.02	18.4		37.5	76.94		61.2	24.5
Same	1	0		31	39		3.7	0		62.2	61.2		7.6	0		6.9	0		20	0		0.7	0					same	7.1	0		0	0		same	32	39		65.23	61.19		14.52	0.04		20.7	0
Same	0	13		32	22		41.7	12.1		15.2	29.5		29.4	30.9		3.2	1.8		34.2	31.2		21.2	42.9					same	7.8	19.6		2.1	1.8		same	32	35		45.71	39.21		32.53	31.08		55.4	74.1
Same	2	0		40	41		12.2	0		14.1	11.6		50	85.7		27.7	29.5		24.4	27.1		26.1	27.2					same	10	34.5		23	27.9		same	42	41		23.59	11.6		54.57	87.36		30.5	54.3
Same	8	18		41	20		0	5.9		25	10.1		68.9	45.2		55.5	42.9		30.2	34.5		34.4	33.2					same	9	4.8		53.7	36.8		same	49	38		25.03	14.98		70.63	51.26		64.6	67.7
Same	10	12		32	0		20.4	0.3		54.7	19.4		50.1	78.1		13.9	34.5		21.2	26.4		24.5	31.4					same	34.7	29		11.8	34.3		same	42	22		71.89	19.62		53.11	78.39		45.7	57.8
New	5	6		19	36		4.2	0.3		14	5.9		32.9	64.9		39.2	44.2		29.2	34.3		30	37.3					male	27.4	7.6		0	43.5		male	48	42		55.5	6.18		32.92	65.64		29.1	71.6
New	54	27		7	44		6.9	5		6.4	20.6		23.6	25.9		49.4	17.2		33.4	23.5		28.7	22.8					male	14.7	9.8		7.2	12		male	58	71		51.78	25.02		29.69	31.1		62	46.3
New	13	0		44	36		14.3	0		33	29		6.6	38.1		13.9	26.9		2.75	30.7		24.6	31.4					male	1.7	2.9		2	25.6		male	34	36		48.13	29.04		8.28	39.59		48.1	62.1
New	0	0		21	36		2.4	0		35.3	11.7		85.3	85.6		3.6	66		26.5	26.4		20.6	26.2					male	29.9	15.4		40.4	61		male	36	36		18.94	11.72		86.73	90.59		59.6	52.8
New	8	5		36	52		2.2	0.8		17	25.2		11.8	42.8		41.8	17.9		24.1	22		33.2	24.4					male	0.3	18.5		11	14		male	52	57		34.29	25.91		14.62	46.65		48.8	46.4
New	12	0		25	33		0.5	0.2		40.2	60.6		44.3	69.6		24.3	0.3		13.3	18.8		27.6	30					male	36.9	64.6		3.2	0.3		male	32	33		41.99	60.74		45.66	69.58		38.5	48.8
New	0	37		20	0		0.9	1.5		41.5	14.6		63.5	60.3		4.6	52.3		22.2	25.7		25.3	26.9					male	32	7.4		21.7	45.5		male	25	37		41.13	15.74		66.08	67.06		49.8	52.6
New	6	54		30	0		0.9	6.9		45	73		71.3	2.7		1.3	0		31.2	56		25.7	0					male	1	2.7		69.1	0		male	32	54		3.75	74.52		74.5	2.76		62	56
New	0	3		24	45		4.5	14.9		15.6	43.6		0	62		0.9	3		0	20.9		30	46.2					male	0	43.2		0	0		male	30	48		47.74	58.34		1.38	65.03		25	67.1
																												female	12.7	7.6		32.1	43.5		female	26	42		19.4	6.18		55.61	65.64		61.8	71.6
																												female	2	9.8		45.8	12		female	60	71		13	25.02		54.13	31.1		59.8	46.3
																												female	0.4	2.9		11	25.6		female	52	36		34.29	29.04		14.62	39.59		48.8	62.1
																												female	1.7	15.4		2	61		female	34	36		48.13	11.72		8.28	90.59		48.1	52.8
																												female	29.9	18.5		40.4	14		female	36	57		18.94	25.91		86.73	46.65		59.6	46.4
																												female	32	64.6		21.7	0.3		female	25	33		41.13	60.74		66.08	69.58		38.5	48.8
																												female	36.9	7.4		3.2	45.5		female	32	37		41.99	15.74		45.66	67.06		49.8	52.6
																												female	0	2.7		0	0		female	30	54		47.74	74.52		1.38	2.76		0	56
																												female	0.6	43.2		0	0		female	45	48		20.88	58.34		1.5	65.03		32.6	67.1
